# Supplementary material for: The mitotic spindle protein CKAP2 potently increases formation and stability of microtubules
Source: eLife. 2022 Jan 14;11:e72202. doi: 10.7554/eLife.72202 (PMC8798059; doi:10.7554/eLife.72202)
Supplement: Figure 2—source data 1. [file elife-72202-fig2-data1.xlsx]

## Sheet: Sheet1
	8uM tubulin	MT growth rates
	conc. CKAP2-mNG (nM)	avg1	avg2		n1	n2	std
	0	0.331867	0.367273		30	37	0.0634613
	12.5	0.506088	0.543898		39	31	0.08529
	25	0.785255	0.867065		30	37	0.113928
	6.5	0.485455			24		0.0696196
	50	1.06186	1.13557		27	19	0.133035
	500 nM CKAP2-mNG								pooled averages and std
	conc. Tubulin (uM)	avg1	avg2		n1	n2			conc. Tubulin (uM)	avg	std
	0.05	0.160306	0.146489		21	27			0.05	0.152457	0.0248483
	0.075	0.291115	0.279625		40	52			0.75	0.28462	0.0356232
	0.1	0.426896	0.432186		56	35			0.1	0.428931	0.0629864
	0.125	0.484002	0.518874		45	40			0.125	0.500198	0.086863
	0.15	0.679529	0.766878		33	22			0.15	0.714468	0.106225
															Fits from linear regression
	0 nM CKAP2-mNG
	conc. Tubulin (uM)	avg1	avg2	avg3	n1	n2	n3		conc. Tubulin (uM)	avg	std			Intercept	Intercept	Slope	Slope	X Intercept	X Intercept	Statistics
	6	0.328034	0.311345	0.24189	97	130	45		6	0.305806	0.0553796
	8	0.479301	0.591702	0.427779	152	183	266		8	0.490723	0.112421		CKAP2 (nm	Value	Standard Error	Value	Standard Error	Value	Standard Error	Adj. R-Square		kon /um/s	kon error	factor		k off	k off error		Critical Concetration uM
	10	0.618398	0.702563	0.768701	153	54	140		10	0.692137	0.141536		0	-0.27977	0.0187	0.09683	0.00227	2.88925	0.12703	0.59905		2.62245	0.0614784	1		-7.57701	0.506452		2.88925	0.12703
													500	-0.11215	0.0129	5.25835	0.12259	0.02133	0.00198	0.83286		142.412	3.3201	54.305		-3.03736	0.349371		0.02133	0.00198
													1000	-0.08815	0.01051	5.35473	0.11028	0.01646	0.00164	0.84177		145.022	2.98671	55.3003		-2.38737	0.284642		0.01646	0.00164
	1000 nM CKAP2-mNG												125	-0.32897	0.04778	4.04812	0.18718	0.08126	0.00811	0.6242		109.635	5.0694	41.8065		-8.90949	1.29403		0.08126	0.00811
	conc. Tubulin (uM)	avg1	avg2		n1	n2			conc. Tubulin (uM)	avg	std
	0.05	0.200524	0.163925		43	25			0.05	0.188005	0.0365676
	0.075	0.301667	0.318507		75	59			0.75	0.309082	0.0435084
	0.1	0.451238	0.439036		73	70			0.1	0.445265	0.0511023
	0.125	0.606238	0.552954		66	49			0.125	0.582873	0.0819479
	125 nM CKAP2-mNG
	conc. Tubulin (uM)	avg1	avg2		n1	n2			conc. Tubulin (uM)	avg	std
	0.25	0.740433	0.653112		44	69			0.2	0.477724	0.0694168
	0.2	0.49674	0.497141		24	61			0.25	0.687113	0.0986265
	0.3	1.02839	0.818319		28	63			0.3	0.882955	0.17071
