# Supplementary material for: The mitotic spindle protein CKAP2 potently increases formation and stability of microtubules
Source: eLife. 2022 Jan 14;11:e72202. doi: 10.7554/eLife.72202 (PMC8798059; doi:10.7554/eLife.72202)
Supplement: Figure 3—source data 1. [file elife-72202-fig3-data1.xlsx]

## Sheet: Sheet1
	Probability to nucleate													hill fits for probability to nucleate
	Tubulin conc. (uM)	probabillity1	probabillity2	probabillity3	# of MTs, n	avg. prob.	std
0 nM CKAP2-mNG	4	0.142857	0		102	0.0714286	0.101015					START	START	END	END	k	k	n	n	Statistics	Statistics
	6	0.374233	0.296296	0.5	271	0.390176	0.102783					Value	Standard Error	Value	Standard Error	Value	Standard Error	Value	Standard Error	Reduced Chi-Sqr	Adj. R-Square
	8	0.714286	0.621212	0.759259	112	0.698252	0.0704064				0 nM CKAP2-mNG	0	0	1	0	6.85235	0.4797	3.36693	0.86244	1.12832	0.9103
	10	0.663158	0.741573	0.780488	184	0.728406	0.0597629
500 nM CKAP2-mNG	0.05	0.513514	0.441176		179	0.477345	0.05115					START	START	END	END	k	k	n	n	Statistics	Statistics
	0.075	0.767677	0.769231		216	0.768454	0.00109885					Value	Standard Error	Value	Standard Error	Value	Standard Error	Value	Standard Error	Reduced Chi-Sqr	Adj. R-Square
	0.1	0.861386	0.977273		145	0.919329	0.0819442				500 nM CKAP2-mNG	0	0	1	0	0.05095	0.00128	3.10239	0.20146	0.19876	0.98944
	0.125	0.890909	0.943662		126	0.917286	0.0373019
	0.15	0.941176	1		145	0.970588	0.0415945
												START	START	END	END	k	k	n	n	Statistics	Statistics
1000 nM CKAP2-mNG	0.05	0.6	0.258065		112	0.429032	0.241785					Value	Standard Error	Value	Standard Error	Value	Standard Error	Value	Standard Error	Reduced Chi-Sqr	Adj. R-Square
	0.075	0.842593	0.871795		186	0.857194	0.0206491				1000 nM CKAP2-mNG	0	0	1	0	0.04709	0.0052	3.78844	0.85262	0.34061	0.90426
	0.1	0.963415	0.92		182	0.941707	0.0306988
	0.125	0.916667	0.980769		148	0.948718	0.0453274					START	START	END	END	k	k	n	n	Statistics	Statistics
												Value	Standard Error	Value	Standard Error	Value	Standard Error	Value	Standard Error	Reduced Chi-Sqr	Adj. R-Square
125 nM CKAP2-mNG	0.2	0.938776	0.493671		164	0.716223	0.314736				125 nM CKAP2-mNG	0	0	1	0	0.17907	0.01366	6.95412	1.39257	0.08637	0.85633
	0.25	0.788235	0.96875		213	0.878493	0.127643
	0.3	1	0.953488		166	0.976744	0.0328887
Spontaneous Nucleation
0 nM CKAP2-mNG						200 nM CKAP2-mNG
n	1	2	3	4		n	1	2	3			linear regression fit for 200 nM CKAP2-mNG
Tubulin conc. (uM)	# of MTs					Tubulin conc. (uM)	# of mts						Value	Standard Error	t-Value	Prob>|t|
5	0											Intercept	-794.255	180.08	-4.41057	0.00104
10	0					0.2	0					Slope	3218.04	485.046	6.6345	3.68756e-05
20	0	0				0.25	0	1	0			X Intercept	0.24681	0.02197	11.2363	2.27983e-07
25	0	4	0			0.3	230	106	402
30	15	41	246	93		0.35	432				Number of Points	13
40	101	406	240			0.375	176	388			Degrees of Freedom	11
50	372	550				0.425	309				Residual Sum of Squares	286418
35	164	137				0.5	1063	690	922		Pearson's r	0.89446
27.5	22	19									R-Square (COD)	0.80006
	linear regression fit for 0 nM CKAP2-mNG										Adj. R-Square	0.78188
		Value	Standard Error	t-Value	Prob>|t|
	Intercept	-457.875	91.628	-4.99711	0.000195562
	Slope	18.0296	2.64249	6.82296	8.28567e-06
	X Intercept	25.3957	1.69074	15.0205	4.99843e-10
Number of Points	16
Degrees of Freedom	14
Residual Sum of Squares	98980.9
Pearson's r	0.87681
R-Square (COD)	0.7688
Adj. R-Square	0.75228
