# Supplementary material for: The mitotic spindle protein CKAP2 potently increases formation and stability of microtubules
Source: eLife. 2022 Jan 14;11:e72202. doi: 10.7554/eLife.72202 (PMC8798059; doi:10.7554/eLife.72202)
Supplement: Figure 4—source data 1. [file elife-72202-fig4-data1.xlsx]

## Sheet: Sheet1
	Catastrophe frequencey
8 uM tubulin	cat/min1	cat/min2		n1	n2
CKAP2-mNG (nM)
0	0.07	0.0795		30	37
6.5	0.0524			24
12.5	0.0409	0.0387		39	31
25	0.01886	0.0177		30	37
50	0	0.004		19	25
	Catastrophe frequencey
0 nM CKAP2-mNG	cat/min1	cat/min2	cat/min3		avg cat/min	n total MTs	stdev
Tubulin conc. (uM)
6	0.16247	0.138229			0.15035	217	0.0171412
8	0.132986	0.108282	0.125401		0.122223	676	0.0126549
10	0.119332	0.0752384	0.103957		0.0995091	502	0.0223806
500 nM CKAP2-mNG
Tubulin conc. (uM)
0.05	0.00464306	0.0151822			0.00991263	234	0.00745228
0.075	0.00573723	0.0101234			0.00793032	232	0.00310149
0.1	0	0.00866426			0.00433213	95	0.00612656
0.125	0.00388802	0.00829617			0.0060921	135	0.00311703
1000 nM CKAP2-mNG
Tubulin conc. (uM)
0.05	0	0.0157212			0.00786061	75	0.0111166
0.075	0.0101234	0			0.0050617	171	0.00715833
0.1	0	0			0	182	0
0.125	0.00139243	0			0.000696217	148	0.0009846
125 nM CKAP2-mNG
Tubulin conc. (uM)
0.2	0.0154418	0.0293055			0.0223737	133	0.00980305
0.25	0.0129723	0.00226843			0.00762035	222	0.00756876
0.3	0.00632211	0			0.00316106	166	0.00447041
