# Supplementary material for: The mitotic spindle protein CKAP2 potently increases formation and stability of microtubules
Source: eLife. 2022 Jan 14;11:e72202. doi: 10.7554/eLife.72202 (PMC8798059; doi:10.7554/eLife.72202)
Supplement: Figure 5—source data 1. [file elife-72202-fig5-data1.xlsx]

## Sheet: Sheet1
		tubulin recruitment
	CKAP2 uM
		avg intensity/background	n	stdev1
	0	1.005	17	0.051
	1	6.407	16	0.86
	CKAP2 uM	shrinkage rate um/min
		avg	n	stdev1
	0	0.0126309	41	0.00286976
	1	5.19409e-05	17	8.29536e-05
