# Supplementary material for: Using PR strategies to enhance public relations in state secondary schools
Source: eLife journal article supplement (doi:10.7554/elife.72202), 2008-05-01
Supplement: supp [file elife_poa_e72202_Supplementary_file_1.xlsx]

## Sheet: Plasmids_Used
Name	Insert	Description	Vector	Promoter(s)	Access
CKAP2 pHAT	6His-mmCKAP2 - StrepTagII	mouse CKAP2	pHAT	T7	Addgene 175946
CKAP2 mNeonGreen pHAT	6His-mmCKAP2 - mNeonGreen -StrepTagII	mouse CKAP2 C-terminal mNeonGreen tag	pHAT	T7	Addgene 175947
mmCKAP2_mNG_noHis_pet21	mmCKAP2 - mNeonGreen -StrepTagII	mouse CKAP2 C-terminal mNeonGreen tag noHis Tag	pET21(+)	T7	Addgene 181750
