# Supplementary material for: The mitotic spindle protein CKAP2 potently increases formation and stability of microtubules
Source: eLife. 2022 Jan 14;11:e72202. doi: 10.7554/eLife.72202 (PMC8798059; doi:10.7554/eLife.72202)
Supplement: Supplementary file 1. [file elife-72202-supp1.xlsx]

## Sheet: Plasmids_Used
Name	Insert	Description	Vector	Promoter(s)	Access
CKAP2 pHAT	6His-mmCKAP2 - StrepTagII	mouse CKAP2	pHAT	T7	Addgene 175946
CKAP2 mNeonGreen pHAT	6His-mmCKAP2 - mNeonGreen -StrepTagII	mouse CKAP2 C-terminal mNeonGreen tag	pHAT	T7	Addgene 175947
mmCKAP2_mNG_noHis_pet21	mmCKAP2 - mNeonGreen -StrepTagII	mouse CKAP2 C-terminal mNeonGreen tag noHis Tag	pET21(+)	T7	Corresponding author (susanne.bechstedt@mcgill.ca)
